# Supplementary material for: The dual impact of antiretroviral therapy and sexual behaviour changes on HIV epidemiologic trends in Uganda: a modelling study
Source: HighWire-hosted journal article supplement (doi:10.1136/sextrans-2013-051219), 2014-02-24
Supplement: sextrans-2013-051219supp_table.pdf [file sextrans-2013-051219supp_table.pdf]

**Table S1. Model Input Ranges** (note: in all subscripts, i=gender, j=age, k=sexual activity group)

| Model Input Parameter<br>(Symbol used in equations)                                                                                                                          | Range                                                                                                                                                                                                                                                            | Source                                                    | Value in top fitting scenario                                                                                                                                                                                                                                                                                                                                                                                                                                                                                                                                                                                                                |     |       |           |       |   |       |   |       |       |   |       |   |       |       |   |       |   |       |       |   |       |   |       |     |   |       |   |       |
|------------------------------------------------------------------------------------------------------------------------------------------------------------------------------|------------------------------------------------------------------------------------------------------------------------------------------------------------------------------------------------------------------------------------------------------------------|-----------------------------------------------------------|----------------------------------------------------------------------------------------------------------------------------------------------------------------------------------------------------------------------------------------------------------------------------------------------------------------------------------------------------------------------------------------------------------------------------------------------------------------------------------------------------------------------------------------------------------------------------------------------------------------------------------------------|-----|-------|-----------|-------|---|-------|---|-------|-------|---|-------|---|-------|-------|---|-------|---|-------|-------|---|-------|---|-------|-----|---|-------|---|-------|
| <b>Demography</b>                                                                                                                                                            |                                                                                                                                                                                                                                                                  |                                                           |                                                                                                                                                                                                                                                                                                                                                                                                                                                                                                                                                                                                                                              |     |       |           |       |   |       |   |       |       |   |       |   |       |       |   |       |   |       |       |   |       |   |       |     |   |       |   |       |
| Fertility rates per year ( $b^j$ )                                                                                                                                           | Fixed (non-varying)                                                                                                                                                                                                                                              | Analysis of Masaka (Uganda) cohort data                   | Age 15-19: 0.180<br>35-39: 0.211<br>20-29: 0.333<br>40-44: 0.079<br>30-34: 0.275<br>45-49: 0.028                                                                                                                                                                                                                                                                                                                                                                                                                                                                                                                                             |     |       |           |       |   |       |   |       |       |   |       |   |       |       |   |       |   |       |       |   |       |   |       |     |   |       |   |       |
| Non HIV-related mortality rates per year ( $\mu_1^j$ )                                                                                                                       | Fixed (non-varying):                                                                                                                                                                                                                                             | Cohort data analysis, fitted to Brass life table model[1] | Life expectancy<br>Females: 69 yrs<br>Males: 66 yrs                                                                                                                                                                                                                                                                                                                                                                                                                                                                                                                                                                                          |     |       |           |       |   |       |   |       |       |   |       |   |       |       |   |       |   |       |       |   |       |   |       |     |   |       |   |       |
| <b>Biology</b>                                                                                                                                                               |                                                                                                                                                                                                                                                                  |                                                           |                                                                                                                                                                                                                                                                                                                                                                                                                                                                                                                                                                                                                                              |     |       |           |       |   |       |   |       |       |   |       |   |       |       |   |       |   |       |       |   |       |   |       |     |   |       |   |       |
| HIV-related mortality rate ( $\mu_s$ ), where s=one of the HIV (not yet AID) HIV states                                                                                      | 0.04-0.10/year                                                                                                                                                                                                                                                   | Cohort analysis                                           | 0.065/year                                                                                                                                                                                                                                                                                                                                                                                                                                                                                                                                                                                                                                   |     |       |           |       |   |       |   |       |       |   |       |   |       |       |   |       |   |       |       |   |       |   |       |     |   |       |   |       |
| AIDS-related mortality rate ( $\mu_s$ ), where s = AIDS state                                                                                                                | 0.7-1.3/year (~ 0.04-0.11/month)                                                                                                                                                                                                                                 | [2]                                                       | 1.29/year                                                                                                                                                                                                                                                                                                                                                                                                                                                                                                                                                                                                                                    |     |       |           |       |   |       |   |       |       |   |       |   |       |       |   |       |   |       |       |   |       |   |       |     |   |       |   |       |
| HIV infection probability per partnership ( $\phi_s^i$ )                                                                                                                     | HIV Stage 2:<br>M to F: 0.01-0.08<br>F to M: (male prob) * (0.05-0.90)                                                                                                                                                                                           | [3-5]                                                     | M->F: 6.7%<br>F->M: 5.5%                                                                                                                                                                                                                                                                                                                                                                                                                                                                                                                                                                                                                     |     |       |           |       |   |       |   |       |       |   |       |   |       |       |   |       |   |       |       |   |       |   |       |     |   |       |   |       |
| Infection probabilities for HIV stage 1, 3, 4 are multiples of Stage 2, to ensure infectiousness from highest to lowest in stages 1, 4, 3, 2, respectively. (Stage 4 = AIDS) | M to F by stage:<br>Stage 1: 0.05-0.72<br>Stage 3: 0.0125-0.54<br>Stage 4: 0.0188-0.71                                                                                                                                                                           |                                                           | M->F: S1: 29%<br>S3: 19%<br>S4: 28%<br>F->M: S1: 21%<br>S3: 14%<br>S4: 21%                                                                                                                                                                                                                                                                                                                                                                                                                                                                                                                                                                   |     |       |           |       |   |       |   |       |       |   |       |   |       |       |   |       |   |       |       |   |       |   |       |     |   |       |   |       |
| Mean duration in each HIV stage = 1/(rate of movement between HIV state s and s') ( $\gamma_{s,s'}$ )                                                                        | Fixed (non-varying)                                                                                                                                                                                                                                              | [2, 6]                                                    | Stage 1: 5 months,<br>stage 2: 7 years,<br>stage 3: 1.5 years,<br>stage 4: 10 months                                                                                                                                                                                                                                                                                                                                                                                                                                                                                                                                                         |     |       |           |       |   |       |   |       |       |   |       |   |       |       |   |       |   |       |       |   |       |   |       |     |   |       |   |       |
| Year of first HIV infection                                                                                                                                                  | 1970-1980                                                                                                                                                                                                                                                        | Earlier than 1982 [7]                                     | 1976                                                                                                                                                                                                                                                                                                                                                                                                                                                                                                                                                                                                                                         |     |       |           |       |   |       |   |       |       |   |       |   |       |       |   |       |   |       |       |   |       |   |       |     |   |       |   |       |
| <b>Sexual Behavior</b>                                                                                                                                                       |                                                                                                                                                                                                                                                                  |                                                           |                                                                                                                                                                                                                                                                                                                                                                                                                                                                                                                                                                                                                                              |     |       |           |       |   |       |   |       |       |   |       |   |       |       |   |       |   |       |       |   |       |   |       |     |   |       |   |       |
| Earliest potential age at sexual debut                                                                                                                                       | 11-15                                                                                                                                                                                                                                                            | Cohort data analysis                                      | 14                                                                                                                                                                                                                                                                                                                                                                                                                                                                                                                                                                                                                                           |     |       |           |       |   |       |   |       |       |   |       |   |       |       |   |       |   |       |       |   |       |   |       |     |   |       |   |       |
| Rate of becoming sexually active ( $\vartheta^{i,j}$ )                                                                                                                       | Beginning with earliest potential age at sexual debut, the rate of becoming sexually active first increases with age, and then decreases.<br><br>Our data show that those not sexually active by a certain age have a very low rate of becoming sexually active. | Cohort data analysis                                      | <table border="1"> <thead> <tr> <th>Age</th> <th>Sex</th> <th>Rate/year</th> </tr> </thead> <tbody> <tr> <td rowspan="2">14-15</td> <td>M</td> <td>0.032</td> </tr> <tr> <td>F</td> <td>0.023</td> </tr> <tr> <td rowspan="2">16-19</td> <td>M</td> <td>0.128</td> </tr> <tr> <td>F</td> <td>0.138</td> </tr> <tr> <td rowspan="2">20-24</td> <td>M</td> <td>0.214</td> </tr> <tr> <td>F</td> <td>0.253</td> </tr> <tr> <td rowspan="2">25-28</td> <td>M</td> <td>0.160</td> </tr> <tr> <td>F</td> <td>0.184</td> </tr> <tr> <td rowspan="2">29+</td> <td>M</td> <td>0.096</td> </tr> <tr> <td>F</td> <td>0.161</td> </tr> </tbody> </table> | Age | Sex   | Rate/year | 14-15 | M | 0.032 | F | 0.023 | 16-19 | M | 0.128 | F | 0.138 | 20-24 | M | 0.214 | F | 0.253 | 25-28 | M | 0.160 | F | 0.184 | 29+ | M | 0.096 | F | 0.161 |
| Age                                                                                                                                                                          | Sex                                                                                                                                                                                                                                                              | Rate/year                                                 |                                                                                                                                                                                                                                                                                                                                                                                                                                                                                                                                                                                                                                              |     |       |           |       |   |       |   |       |       |   |       |   |       |       |   |       |   |       |       |   |       |   |       |     |   |       |   |       |
| 14-15                                                                                                                                                                        | M                                                                                                                                                                                                                                                                | 0.032                                                     |                                                                                                                                                                                                                                                                                                                                                                                                                                                                                                                                                                                                                                              |     |       |           |       |   |       |   |       |       |   |       |   |       |       |   |       |   |       |       |   |       |   |       |     |   |       |   |       |
|                                                                                                                                                                              | F                                                                                                                                                                                                                                                                | 0.023                                                     |                                                                                                                                                                                                                                                                                                                                                                                                                                                                                                                                                                                                                                              |     |       |           |       |   |       |   |       |       |   |       |   |       |       |   |       |   |       |       |   |       |   |       |     |   |       |   |       |
| 16-19                                                                                                                                                                        | M                                                                                                                                                                                                                                                                | 0.128                                                     |                                                                                                                                                                                                                                                                                                                                                                                                                                                                                                                                                                                                                                              |     |       |           |       |   |       |   |       |       |   |       |   |       |       |   |       |   |       |       |   |       |   |       |     |   |       |   |       |
|                                                                                                                                                                              | F                                                                                                                                                                                                                                                                | 0.138                                                     |                                                                                                                                                                                                                                                                                                                                                                                                                                                                                                                                                                                                                                              |     |       |           |       |   |       |   |       |       |   |       |   |       |       |   |       |   |       |       |   |       |   |       |     |   |       |   |       |
| 20-24                                                                                                                                                                        | M                                                                                                                                                                                                                                                                | 0.214                                                     |                                                                                                                                                                                                                                                                                                                                                                                                                                                                                                                                                                                                                                              |     |       |           |       |   |       |   |       |       |   |       |   |       |       |   |       |   |       |       |   |       |   |       |     |   |       |   |       |
|                                                                                                                                                                              | F                                                                                                                                                                                                                                                                | 0.253                                                     |                                                                                                                                                                                                                                                                                                                                                                                                                                                                                                                                                                                                                                              |     |       |           |       |   |       |   |       |       |   |       |   |       |       |   |       |   |       |       |   |       |   |       |     |   |       |   |       |
| 25-28                                                                                                                                                                        | M                                                                                                                                                                                                                                                                | 0.160                                                     |                                                                                                                                                                                                                                                                                                                                                                                                                                                                                                                                                                                                                                              |     |       |           |       |   |       |   |       |       |   |       |   |       |       |   |       |   |       |       |   |       |   |       |     |   |       |   |       |
|                                                                                                                                                                              | F                                                                                                                                                                                                                                                                | 0.184                                                     |                                                                                                                                                                                                                                                                                                                                                                                                                                                                                                                                                                                                                                              |     |       |           |       |   |       |   |       |       |   |       |   |       |       |   |       |   |       |       |   |       |   |       |     |   |       |   |       |
| 29+                                                                                                                                                                          | M                                                                                                                                                                                                                                                                | 0.096                                                     |                                                                                                                                                                                                                                                                                                                                                                                                                                                                                                                                                                                                                                              |     |       |           |       |   |       |   |       |       |   |       |   |       |       |   |       |   |       |       |   |       |   |       |     |   |       |   |       |
|                                                                                                                                                                              | F                                                                                                                                                                                                                                                                | 0.161                                                     |                                                                                                                                                                                                                                                                                                                                                                                                                                                                                                                                                                                                                                              |     |       |           |       |   |       |   |       |       |   |       |   |       |       |   |       |   |       |       |   |       |   |       |     |   |       |   |       |
| Desired partner turnover rate by gender, age, sexual activity group, not in AIDS state ( $\Delta^{i,j,k}$ )                                                                  | Until age 30, the ranges for ( $\Delta_{i,j,k}$ ):<br>High activity: 20-90<br>Middle activity: 1-5                                                                                                                                                               | Cohort data analysis                                      | $\Delta_{i,j,k}$ for Age < 30:<br><br><table border="1"> <thead> <tr> <th>Sex</th> <th>Group</th> <th>Rate/yr</th> </tr> </thead> </table>                                                                                                                                                                                                                                                                                                                                                                                                                                                                                                   | Sex | Group | Rate/yr   |       |   |       |   |       |       |   |       |   |       |       |   |       |   |       |       |   |       |   |       |     |   |       |   |       |
| Sex                                                                                                                                                                          | Group                                                                                                                                                                                                                                                            | Rate/yr                                                   |                                                                                                                                                                                                                                                                                                                                                                                                                                                                                                                                                                                                                                              |     |       |           |       |   |       |   |       |       |   |       |   |       |       |   |       |   |       |       |   |       |   |       |     |   |       |   |       |

|                                                                                                                                                                                                                 |                                                                                                                                                                                      |                                               |                                                                                                                  |
|-----------------------------------------------------------------------------------------------------------------------------------------------------------------------------------------------------------------|--------------------------------------------------------------------------------------------------------------------------------------------------------------------------------------|-----------------------------------------------|------------------------------------------------------------------------------------------------------------------|
|                                                                                                                                                                                                                 | Low activity: (middle activity rate) *<br>(0.1 – 0.5)<br><br>Age 30+: $\Delta_{i,j,k}$ reduces by 3%/year                                                                            |                                               | M High 68.24<br>Mid 1.99<br>Low 0.25<br>F High 36.62<br>Mid 2.96<br>Low 1.15                                     |
| Desired partner turnover rate by gender, age, sexual activity group, in AIDS state ( $\Delta_{i,j,k}$ )                                                                                                         | ( $\Delta_{i,j,k}$ ) * (0.20 – 0.80)                                                                                                                                                 | Cohort data analysis (with limited data)      | 0.41                                                                                                             |
| Proportion entering each activity group at sexual debut - based on partner turnover desire ( $b_k$ )                                                                                                            | High: 0.1%-3.0%<br>Middle: 30% - 85%<br>Low: 100%-high-middle                                                                                                                        | Cohort data analysis                          | High: 2.7%<br>Middle: 62.0%<br>Low: 35.3%                                                                        |
| Cross generational age mixing: Proportion entering each 'cross generational' activity group – based on desired age mixing:<br><br>( $b_k$ ) * (proportion of women willing to have cross generational partners) | Range at sexual debut: 0-50%<br><br>Rate of leaving cross-generational age mixing group: 0.00-0.10                                                                                   | Cohort data analysis                          | 31% at sexual debut.<br><br>Starting at age 25, the rate of leaving this compartment (among women) = 0.060/year. |
| Age mixing (non-x-generational)<br><br>Applies to partnerships that are not with women willing to engage in cross-generational sex.                                                                             | Maximum age difference between partners: 2-7 years.<br><br>80% of partnerships are desired with older males, while 20% with younger/same age males.                                  | Cohort data analysis                          | $\pm 3$ years                                                                                                    |
| Assortativity of mixing by sexual activity group ( $\epsilon_k$ )                                                                                                                                               | 0 to 1<br><br>0 = assortative<br>1 = proportional to partnerships on offer                                                                                                           | [8]                                           | 0.66                                                                                                             |
| Balancing parameter ( $\theta$ )                                                                                                                                                                                | 0 to 1<br><br>0 = men get what they are requesting and women increase/decrease partnerships to match male demand.<br>1 = women get what they request.<br>Between 0-1 = a compromise. | [9]                                           | 0.98                                                                                                             |
| Year of intentional behavior change                                                                                                                                                                             | 1 <sup>st</sup> year of change: 1988-1991<br>2 <sup>nd</sup> year of change: 1998-2000                                                                                               | Cohort data analysis, and [10]                | 1988.7<br>1998.0                                                                                                 |
| Factor changing desired sexual partner turnover rates:<br>New $\Delta_{i,j,k} = (\text{Old } \Delta_{i,j,k}) * \text{factor}$                                                                                   | 1988-1991: 0.44 – 0.99<br>1998-2000: 1.01 – 2.01                                                                                                                                     | Turnover rates change gradually over 2 years. | 1988.7: 0.97<br>1998.0: 1.02                                                                                     |

## References

1. Brass, W., *Methods for Estimating Fertility and Mortality from Limited and Defective Data*. An Occasional Publication, 1975(Chapel Hill: POPLAB).
2. Morgan, D., et al., *HIV-1 infection in rural Africa: is there a difference in median time to AIDS and survival compared with that in industrialized countries?* *Aids*, 2002. **16**(4): p. 597-603.
3. Wawer, M., et al., *Rates of HIV-1 Transmission per Coital Act, by Stage of HIV-1 Infection, in Rakai, Uganda*. *J Inf Dis*, 2005. **191**: p. 1403-1409.
4. Powers, K., et al., *Rethinking the heterosexual infectivity of HIV-1: a systematic review and meta-analysis*. *Lancet Infect Dis*, 2008. **8**: p. 553-63.
5. Rottingen, J. and G. Garnett, *The Epidemiological and Control Implications of HIV Transmission Probabilities Within Partnerships*. *Sex Transm Dis*, 2002. **29**(12): p. 818-827.
6. Todd, J., et al., *Time from HIV seroconversion to death: a collaborative analysis of eight studies in six low and middle-income countries before highly active antiretroviral therapy*. *AIDS*, 2007. **21**(suppl 6): p. s55-s63.
7. Serwadda, D., et al., *Slim disease: a new disease in Uganda and its associations with HTLV III infection*. *The Lancet*, 1985. **2**: p. 849-852.
8. Hallett, T.B., et al., *Declines in HIV prevalence can be associated with changing sexual behaviour in Uganda, urban Kenya, Zimbabwe, and urban Haiti*. *Sex Transm Infect*, 2006. **82 Suppl 1**: p. i1-8.
9. Garnett, G. and R. Anderson, *Balancing sexual partnerships in an age and activity stratified model of HIV transmission in heterosexual populations*. *J Math Applied in Med & Biology*, 1994. **11**: p. 161-192.
10. Kamali, A., et al., *Seven-year trends in HIV-1 infection rates, and changes in sexual behaviour, among adults in rural Uganda*. *AIDS*, 2000. **14**(4): p. 427.
